# Supplementary material for: Ca-Doped mesoporous SiO2/dental resin composites with enhanced mechanical properties, bioactivity and antibacterial properties
Source: Royal Society of Chemistry journal article supplement (doi:10.1039/c7tb02864d), 2018-01-01
Supplement: c7tb02864d1.pdf [file c7tb02864d1.pdf]

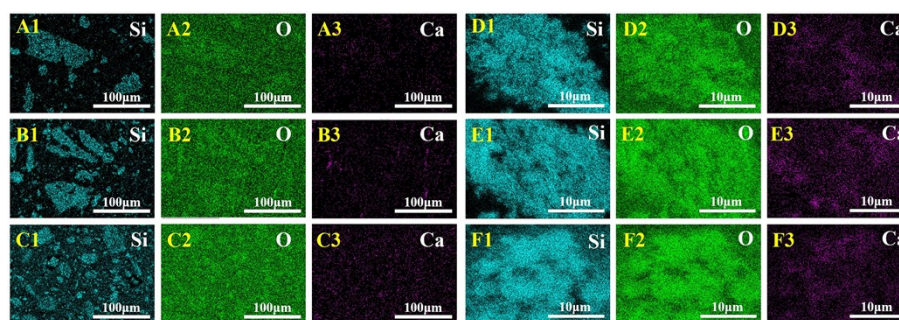

**Figure. S1** The distribution of MCS in the resin matrix by EDS-mapping analysis. A1-A3, B1-B3 and C1-C3 images represent the distribution of MCS in the cross-section of 5RC, 10RC and 20RC, respectively; D1-D3, E1-E3 and F1-F3 images represent the distribution of MCS on the surface of 5RC, 10RC and 20RC, respectively. The distribution of MCS in the cross-section and on the surface of resin composites becomes dense and uniform with the increase of the amount of MCS nanoparticles.
